# Supplementary material for: A Measure of Active Interfaces in Supported Catalysts for High-temperature Reactions
Source: Research Square preprint supplement (doi:10.21203/rs.3.rs-182805/v1), 2021-03-11
Supplement: Supplementary file 1 [file 99782236bb9b0c0f4f243bff.pdf]

## Supplementary information

### A Measure of Active Interfaces in Supported Catalysts for High-temperature Reactions

Siwon Lee<sup>1, 6</sup>; Hyunwoo Ha<sup>2, 6</sup>; Kyung Taek Bae<sup>3, 6</sup>; Seunghyun Kim<sup>1</sup>; Hyuk Choi<sup>2</sup>; Jun Hyuk Kim<sup>1</sup>; Jongsu Seo<sup>1</sup>; Jin Seok Choi<sup>4</sup>; Yong-Ryun Jo<sup>5</sup>; Bong-Joong Kim<sup>5</sup>; Kang Taek Lee<sup>3, \*</sup>; Hyun You Kim<sup>2, \*</sup>; WooChul Jung<sup>1, \*</sup>

<sup>1</sup>Department of Materials Science and Engineering, Korea Advanced Institute of Science and Technology (KAIST), Daejeon, Republic of Korea

<sup>2</sup>Department of Materials Science and Engineering, Chungnam National University (CNU), Daejeon, Republic of Korea

<sup>3</sup>Department of Mechanical Engineering, Korea Advanced Institute of Science and Technology (KAIST), Daejeon, Republic of Korea

<sup>4</sup>KAIST Analysis center for Research Advancement (KARA), Korea Advanced Institute of Science and Technology (KAIST), Daejeon, Republic of Korea

<sup>5</sup>Department of Materials Science and Engineering, Gwangju Institute of Science and Technology (GIST), Gwangju, Republic of Korea

**\*Corresponding authors E-mail:** WooChul Jung (wcjung@kaist.ac.kr), Hyun You Kim (kimhy@cnu.ac.kr), Kang Taek Lee (leekt@kaist.ac.kr).

<sup>6</sup>These authors contributed equally: Siwon Lee, Hyunwoo Ha, Kyung Taek Bae.

**Fig. S1.**

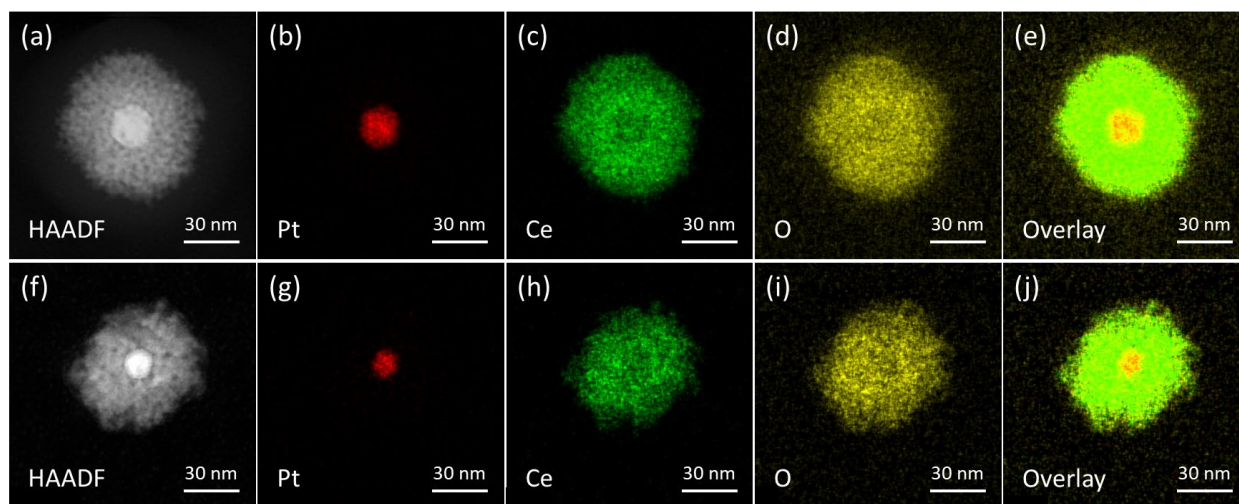

Representative HAADF images and EDS mapping images of (a-e) Pt-large@CeO<sub>2</sub> and (f-j) Pt-small@CeO<sub>2</sub> catalysts

40 **Fig. S2.**

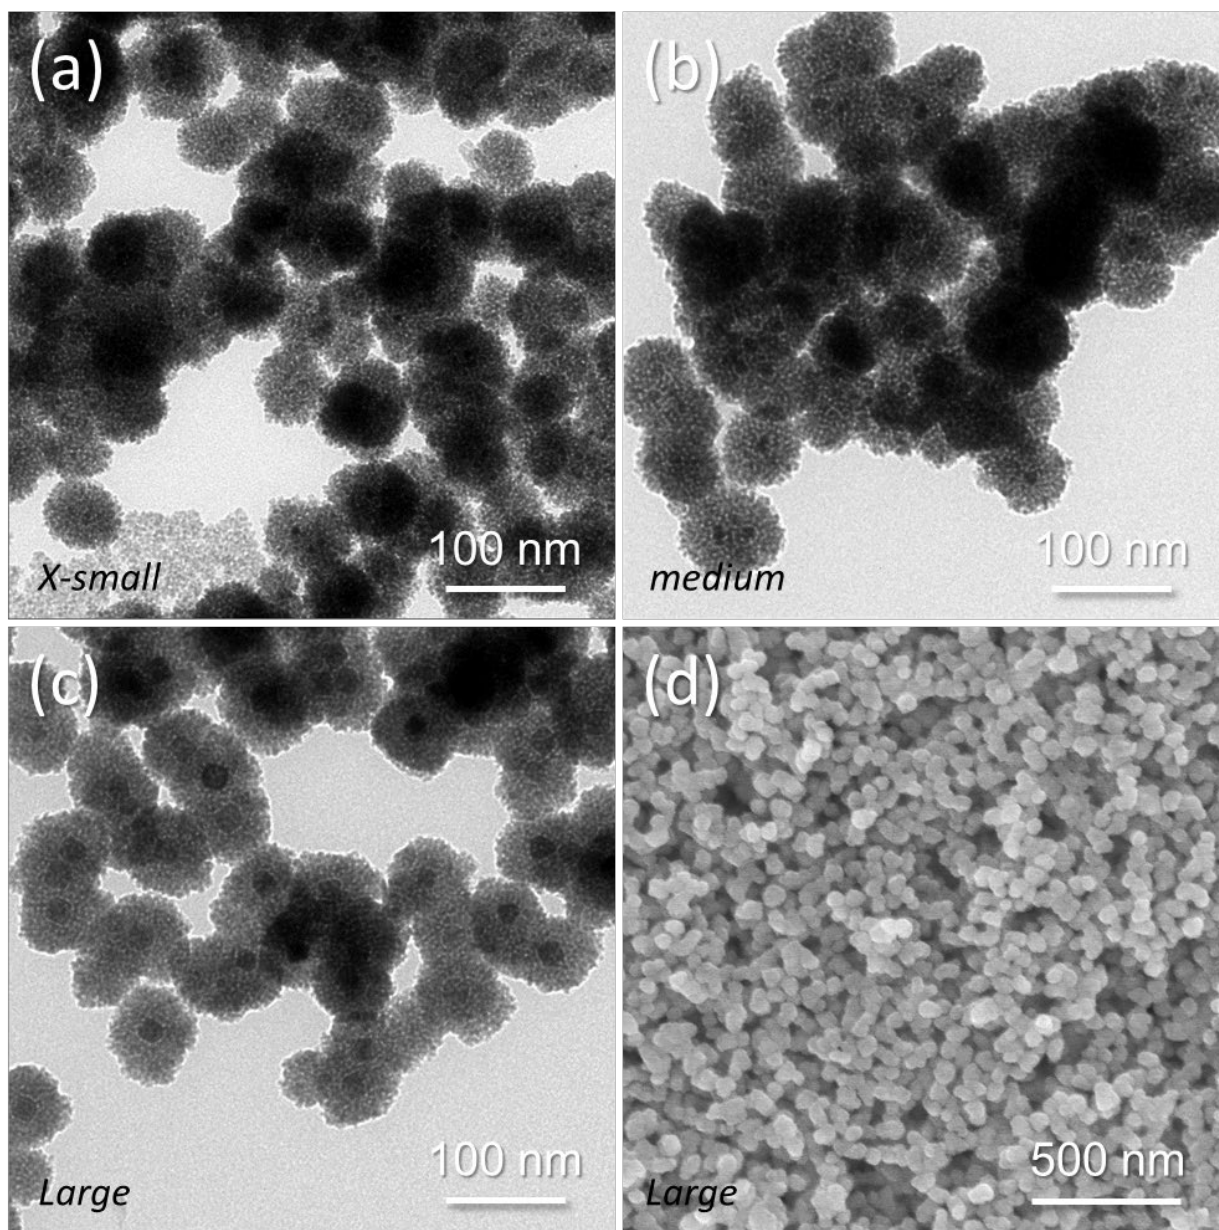

41  
42 Representative TEM images of Pt@CeO<sub>2</sub> catalysts with (a) x-small Pt NPs, (b) medium-sized Pt  
43 NPs, and (c) large Pt NPs. (d) A SEM image of Pt-large@CeO<sub>2</sub> catalysts is also shown.

47 **Fig. S3.**

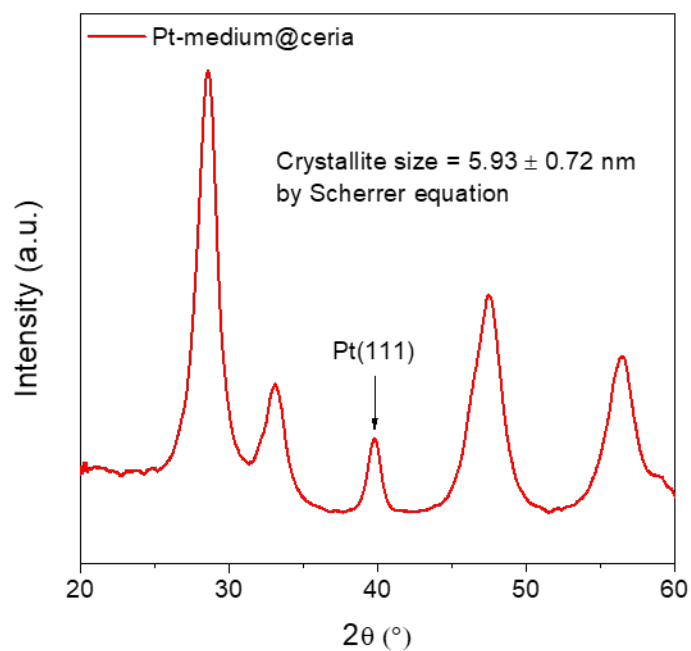

48  
49 Powder X-ray diffraction (XRD) patterns of Pt-medium@CeO<sub>2</sub>. The average crystallite size of  
50 CeO<sub>2</sub> in the outer layer was approximately 6 nm, as calculated by the Scherrer equation.

51  
52  
53  
54  
55  
56  
57  
58  
59  
60

**Fig. S4.**

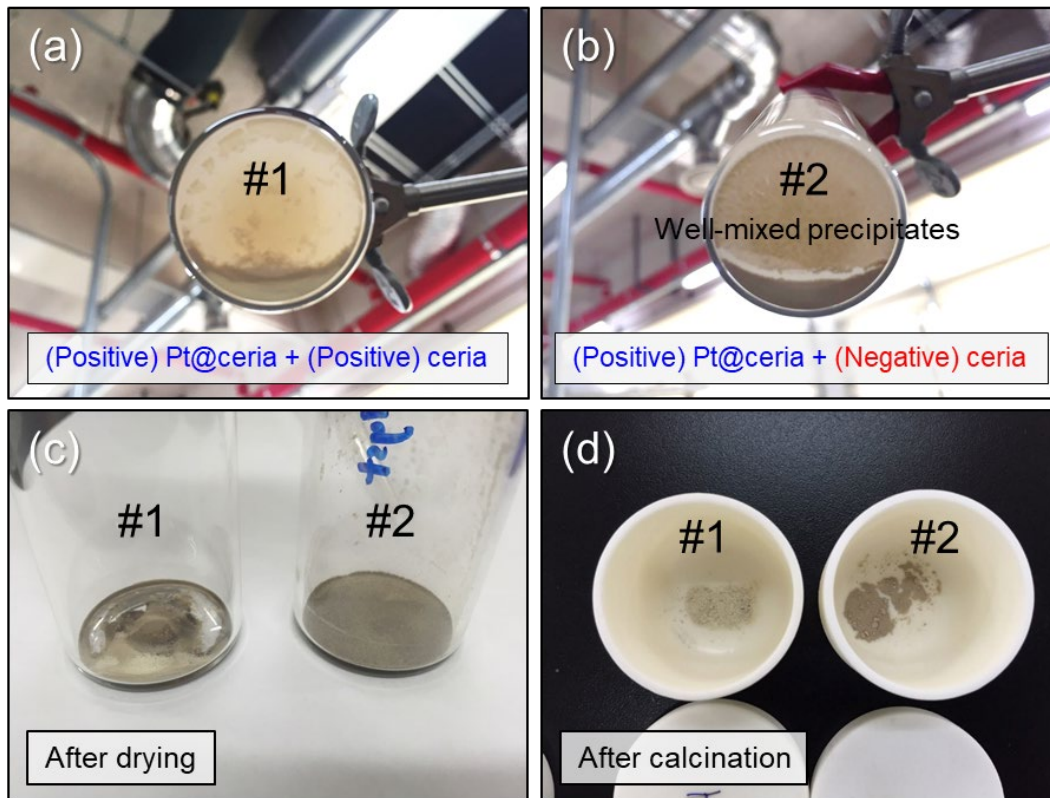

Effect of the surface potential on the resulting Pt@CeO<sub>2</sub>/CeO<sub>2</sub> sample: (a) When the surface potential of the CeO<sub>2</sub> support and Pt@CeO<sub>2</sub> are both positive, the Pt@CeO<sub>2</sub> catalyst is not evenly deposited on the CeO<sub>2</sub> support after mixing in a solution (sample #1). On the other hand, (b) when the surface potentials differs from each other between the CeO<sub>2</sub> support and the Pt@CeO<sub>2</sub> catalyst, uniformly mixed precipitates are obtained after mixing in a solution (sample #2). (c, d) The effect of surface potential of the sample can also be confirmed after the drying and calcination steps. The surface potential was measured by a zeta-potential analysis, and these results are compiled in Table S6.

**Fig. S5.**

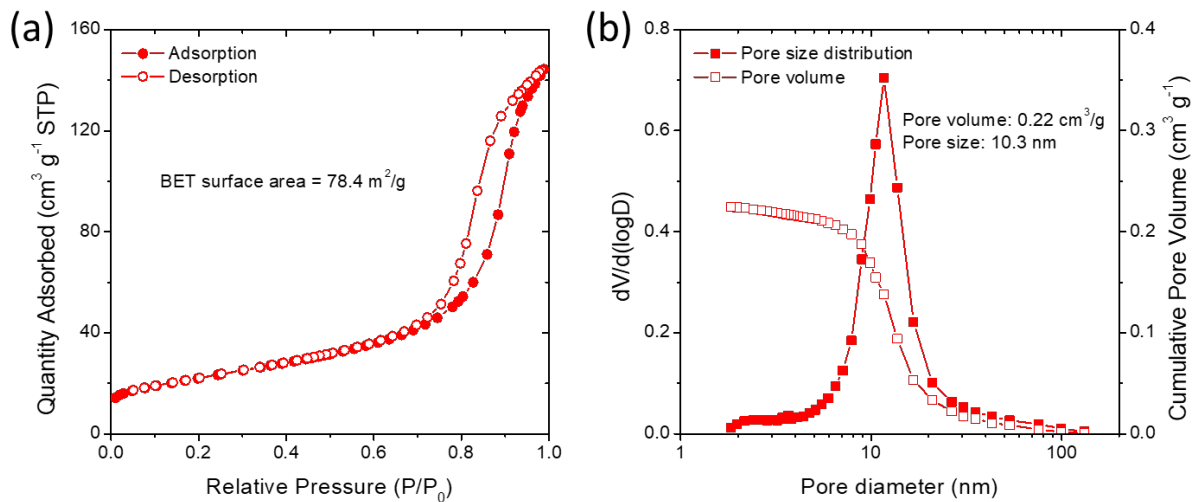

(a) Nitrogen adsorption and desorption isotherms and (b) pore size distribution and cumulative pore volumes for the CeO<sub>2</sub> support. The BET surface area was 78.4 m<sup>2</sup> g<sup>-1</sup>. The pore volume was 0.22 cm<sup>3</sup> g<sup>-1</sup>, and the average pore size was 10.3 nm.

90 **Fig. S6.**

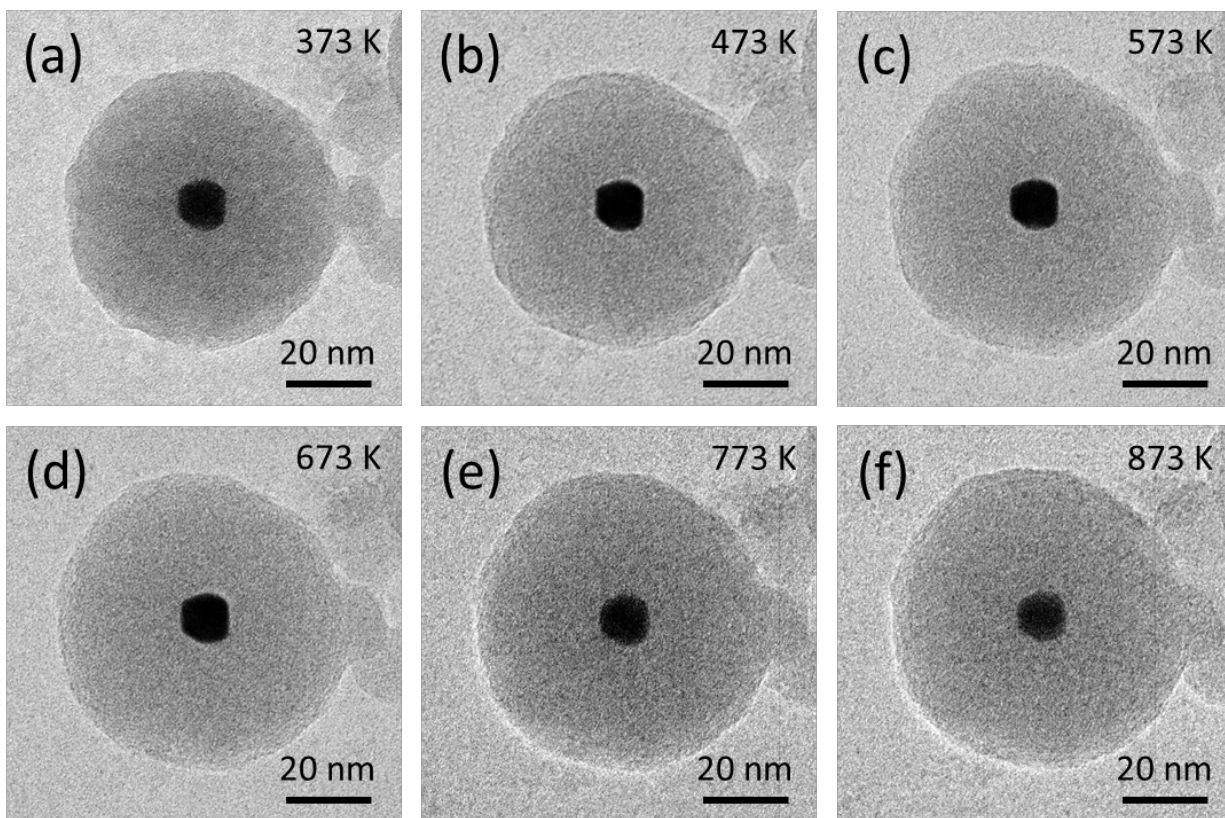

91  
92 *In situ* heating TEM observations of Pt-medium@SiO<sub>2</sub> catalysts after heating at (a) 373 K, (b) 473  
93 K, (c) 573 K, (d) 673 K, (e) 773 K, and (f) 873 K.



102 **Fig. S7.**

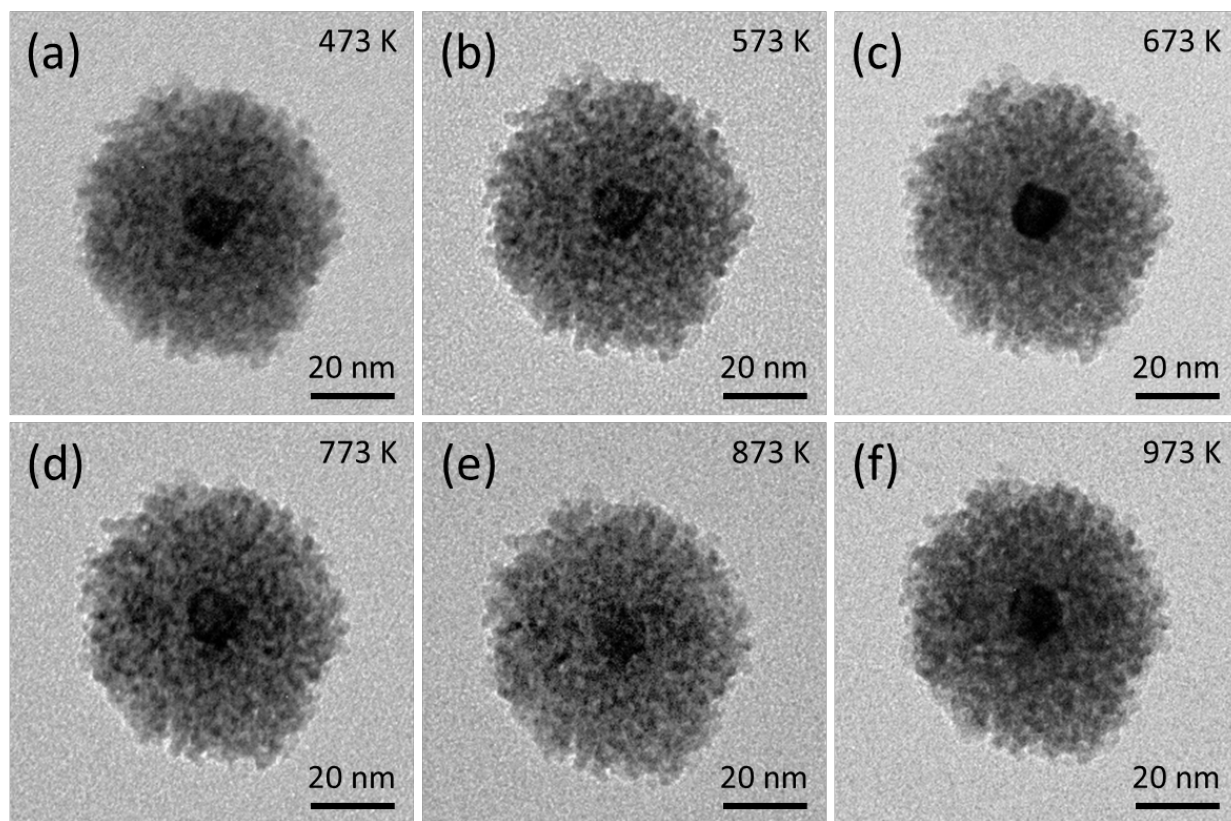

103  
104 *In situ* heating TEM observations of Pt-medium@CeO<sub>2</sub> catalysts after heating at (a) 473 K, (b)  
105 573 K, (c) 673 K, (d) 773 K, (e) 873 K, and (f) 973 K.

106

107

108

109

110

111

112

113



114 **Fig. S8.**

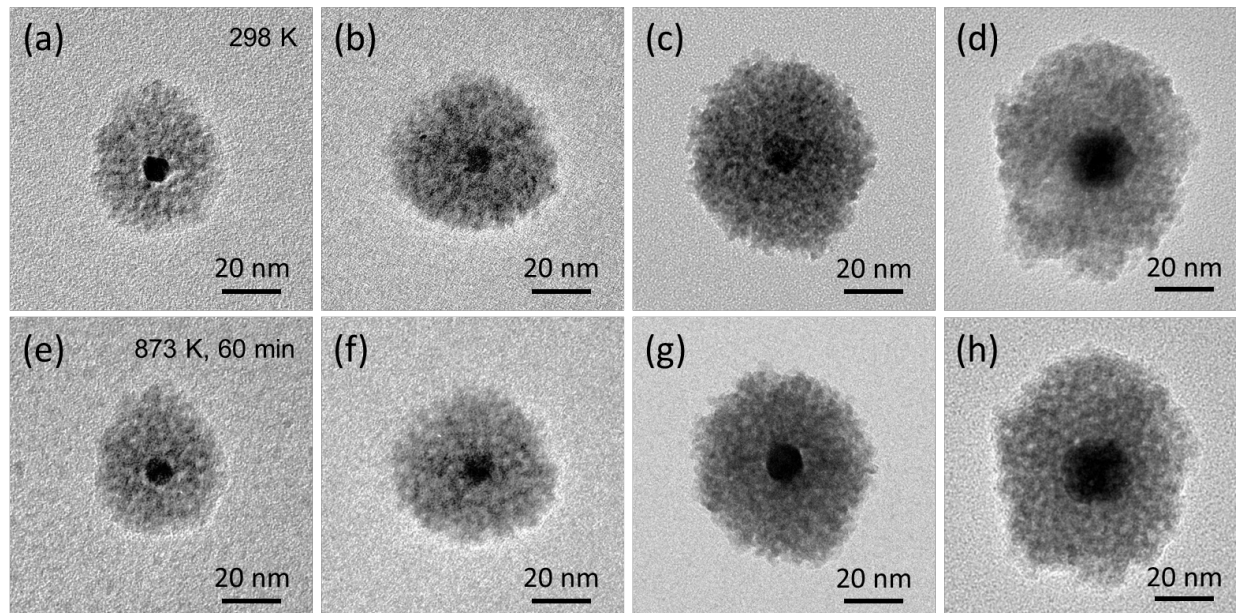

115  
116 *In situ* TEM images of CeO<sub>2</sub>-encapsulated Pt NPs with different core sizes. The first row shows  
117 the morphology of the catalysts at 298 K, and the second row presents the catalysts after annealing  
118 at 873 K for 60 min: (a, e) x-small (b, f) small (c, g) medium, and (d, h) large Pt NPs.

129 **Fig. S9.**

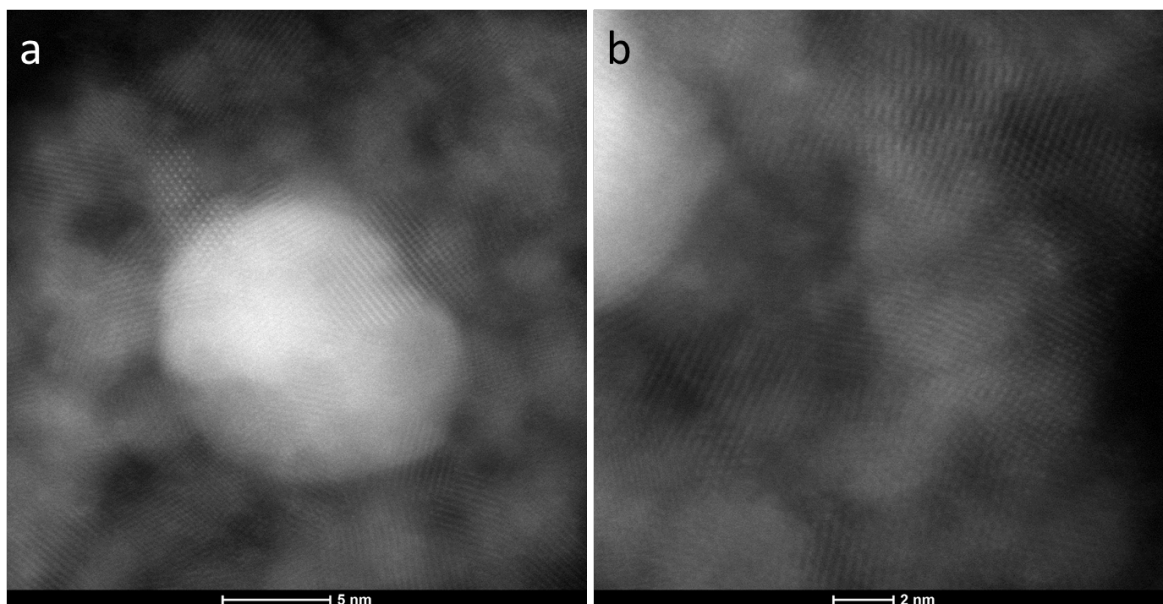

130  
131 Representative aberration-corrected TEM images of Pt@CeO<sub>2</sub> obtained at (a) 3,600k $\times$  and (b)  
132 5,100k $\times$  magnification after a thermal treatment at 873 K for 10 h.

144 **Fig. S10.**

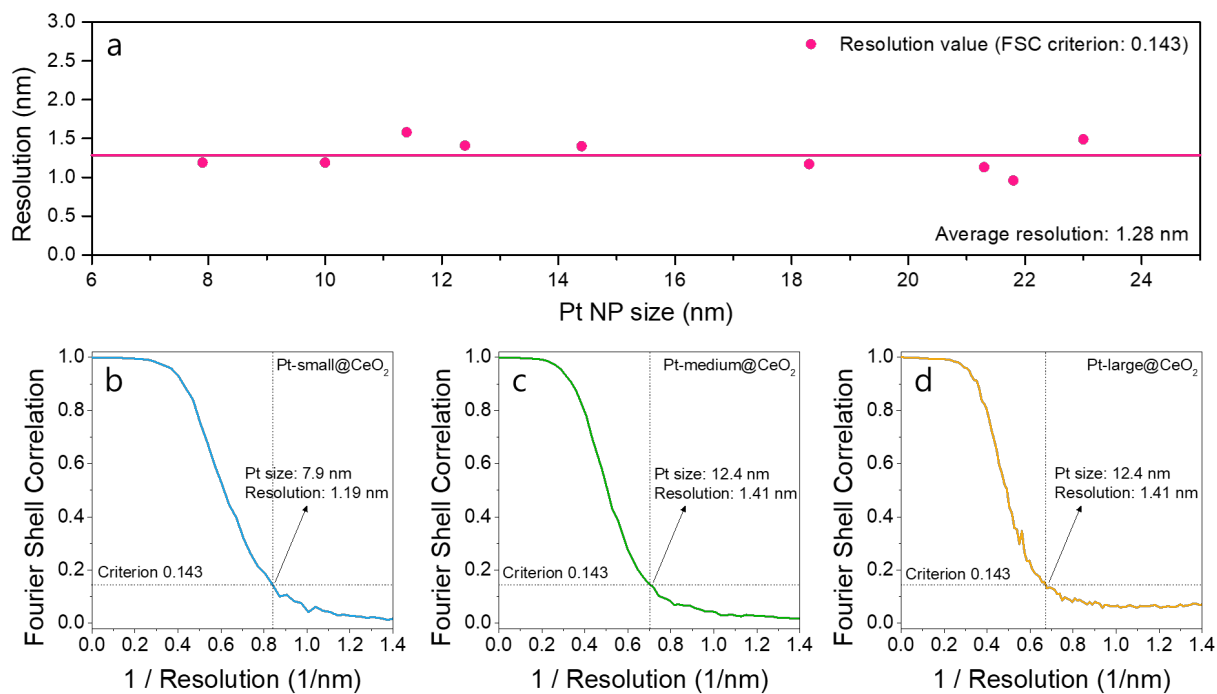

145  
 146 (a) 3D resolution values of samples plotted as a function of the Pt NP size. Representative Fourier  
 147 shell correlation (FSC) results obtained for the (b) Pt-small@CeO<sub>2</sub>, (c) Pt-medium@CeO<sub>2</sub>, and (d)  
 148 Pt-large@CeO<sub>2</sub> samples.

**Fig. S11.**

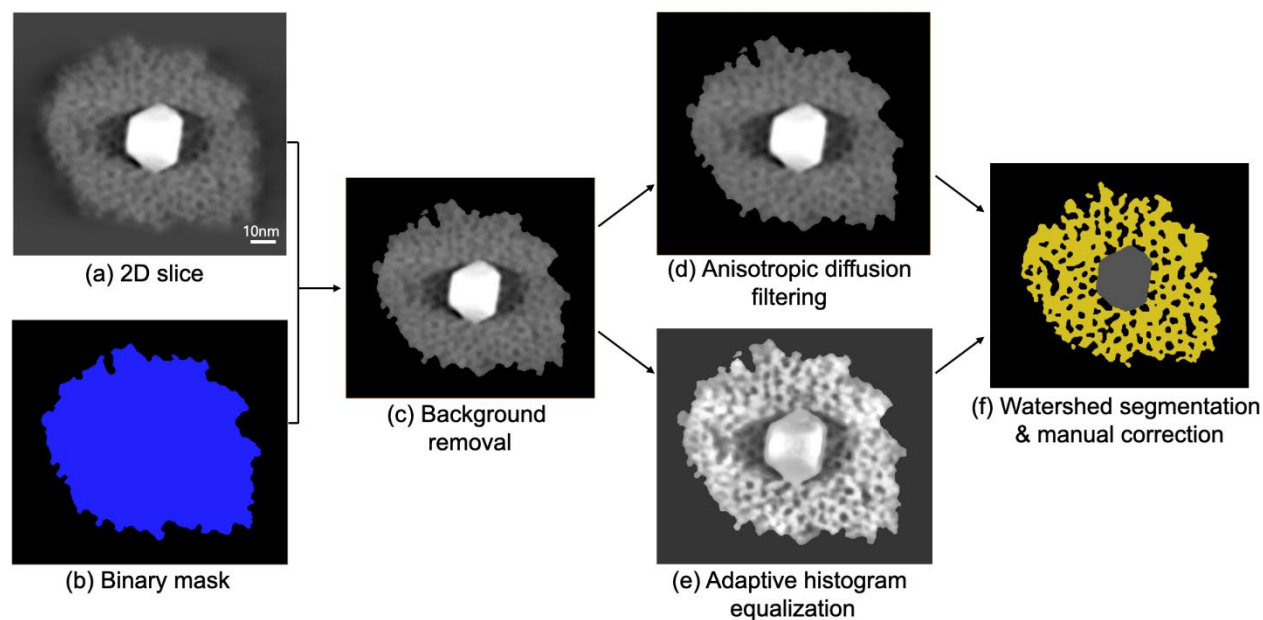

Semi-automated segmentation process applied to tomograms. The background of the original slice of the tomogram was removed by a binary mask (a-c). Anisotropic diffusion filtering (d) and adaptive histogram equalization (e) were performed to reduce the noise and enhance the contrast of each phase, respectively. Designation of each phase (grey: Pt, yellow: ceria, black: pore) was conducted by watershed segmentation and corrected in a manual fashion (f).

171 **Fig. S12.**

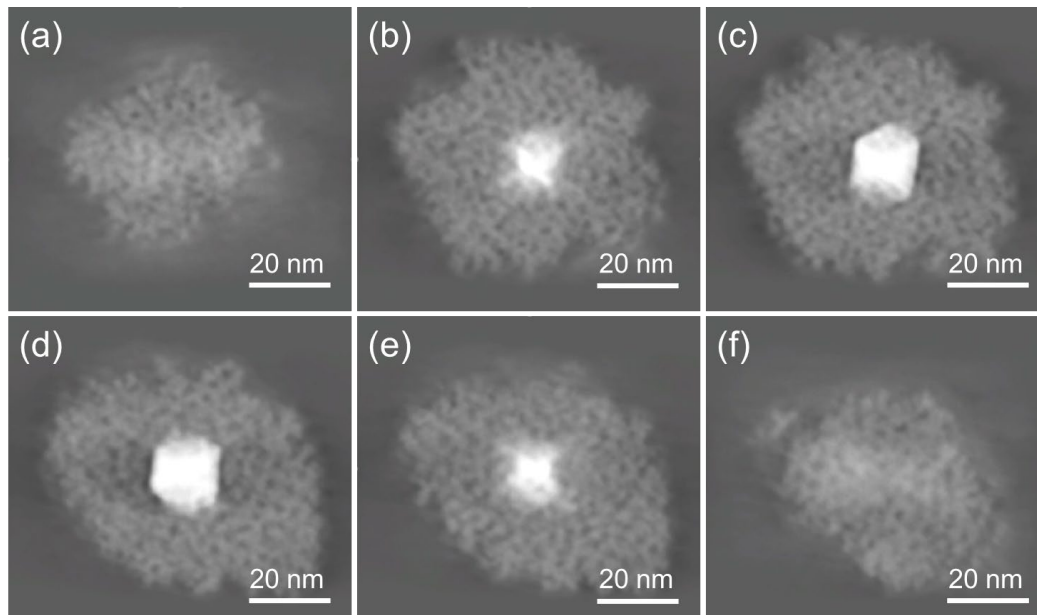

172  
173 (a to f) Cross-sectional view of the volume-constructed Pt@CeO<sub>2</sub> core-shell catalyst along the Z-  
174 axis

187 **Fig. S13.**

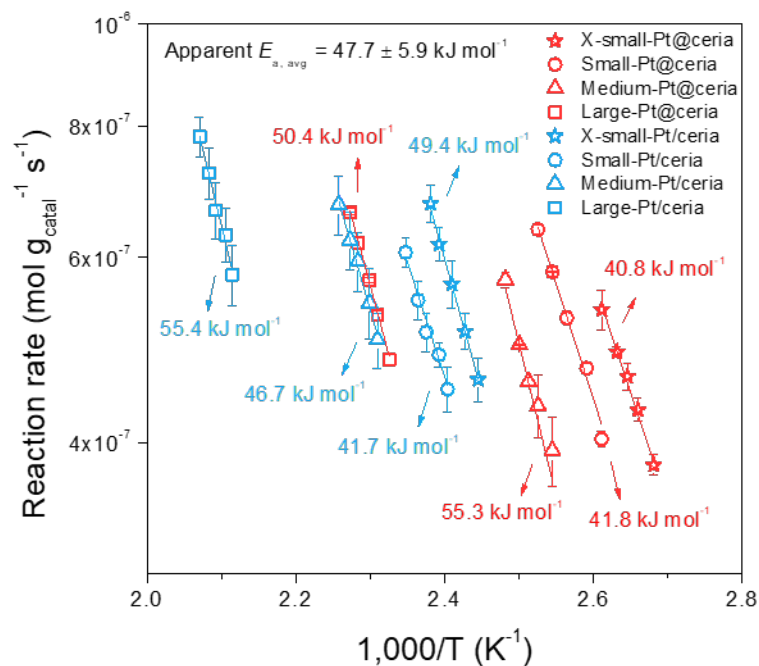

188

189 Arrhenius-type plots of CO oxidation over  $\text{CeO}_2$ -encapsulated (red) and -supported (blue) Pt

190 catalysts. Apparent activation energy values are similar to each other, demonstrating that the

191 reaction mechanism of the Pt- $\text{CeO}_2$  system toward CO oxidation was not affected by the different

192 morphologies of the samples. In addition, the Pt@ $\text{CeO}_2$  sample outperforms the  $\text{CeO}_2$ -supported

193 Pt catalyst regardless of the Pt NP size due to the increased length of the interface in the core-shell

194 structure. Thus, the CO oxidation reaction is mainly governed by the interface between  $\text{CeO}_2$  and

195 Pt in Pt@ $\text{CeO}_2$ . Error bars indicate standard errors for reaction rates.

200 **Fig. S14.**

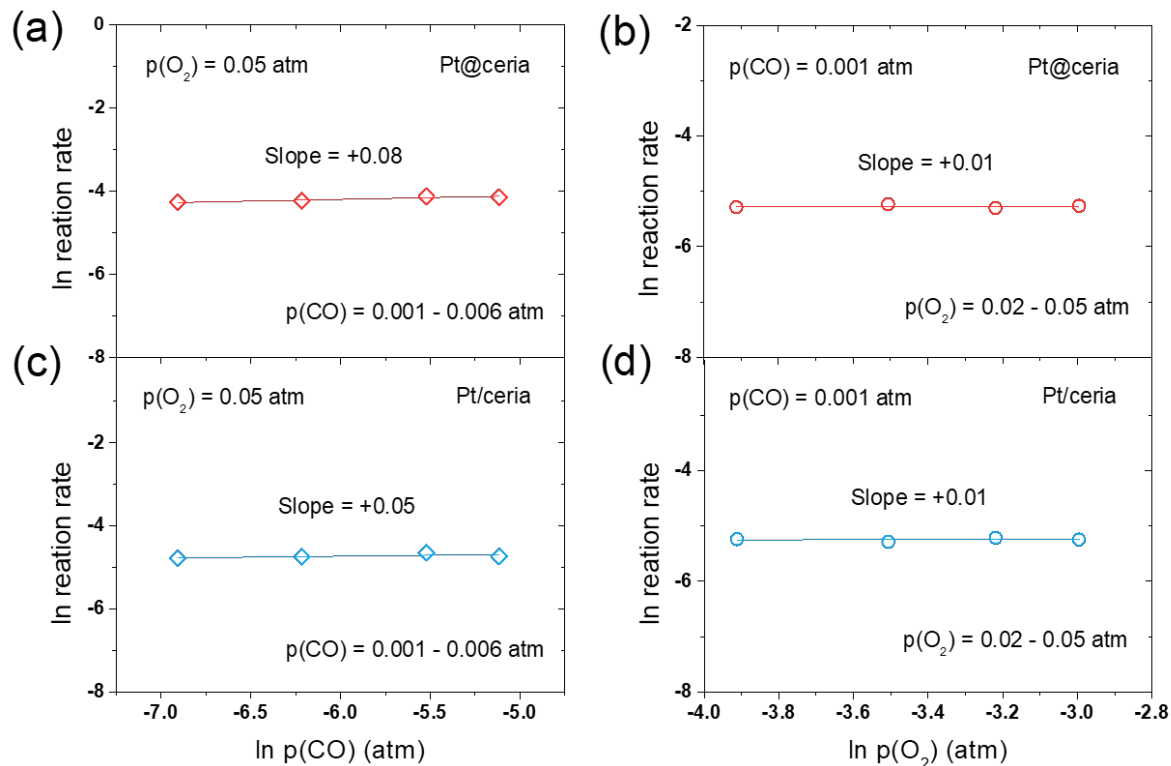

201

202 Reaction orders for (a, c) CO and (b, d) O<sub>2</sub> of the Pt-CeO<sub>2</sub> catalysts; top, Pt@CeO<sub>2</sub>; bottom;

203 Pt/CeO<sub>2</sub>. The reaction orders for CO and O<sub>2</sub> are similar between the Pt@CeO<sub>2</sub> and Pt/CeO<sub>2</sub>

204 catalysts, indicating that the reaction mechanism of Pt-CeO<sub>2</sub> catalysts toward CO oxidation is not

205 affected by the morphology of the catalysts. Thus, the CO oxidation reaction is mainly governed

206 by the interface between CeO<sub>2</sub> and Pt in Pt@CeO<sub>2</sub>.



213 **Fig. S15.**

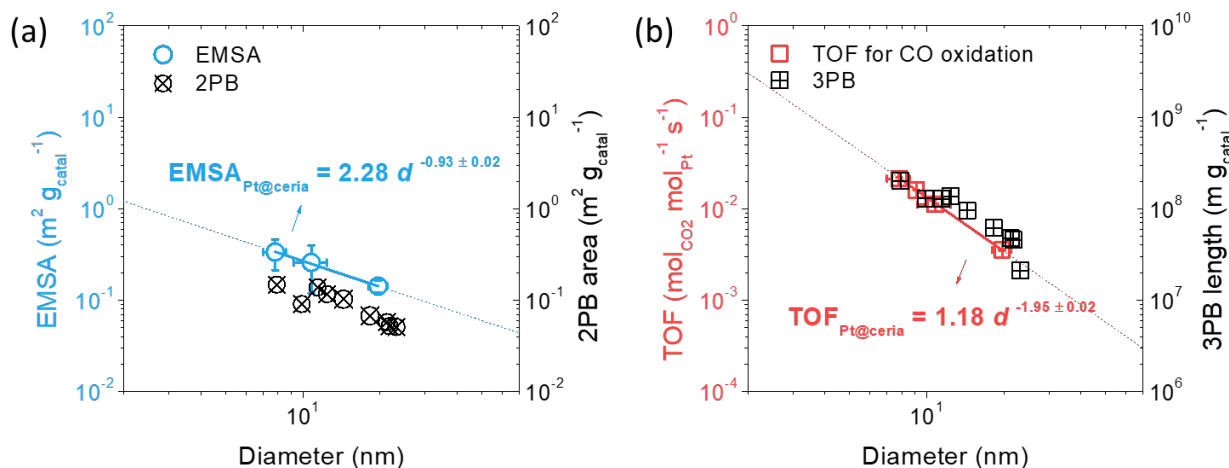

214

215 (a) Exposed metallic surface area (blue circle symbols) and (b) TOFs for CO oxidation (red square

216 symbols) at 403 K plotted as a function of the particle diameter of the Pt@CeO<sub>2</sub> catalysts. Circle

217 with superimposed × symbols (⊗) for the 2PB and squared plus symbols (⊞) for the 3PB

218 densities as calculated by 3D tomography are plotted together in (a) and (b), respectively, for

219 reference. These results indicate that the changes of the 2PB and 3PB site density levels determined

220 by CO chemisorption and oxidation experiments according to the diameter are in line with those

221 obtained from 3D electron tomography analyses. Error bars indicate standard errors for particle

222 sizes, EMSA, and TOFs.

229 **Fig. S16.**

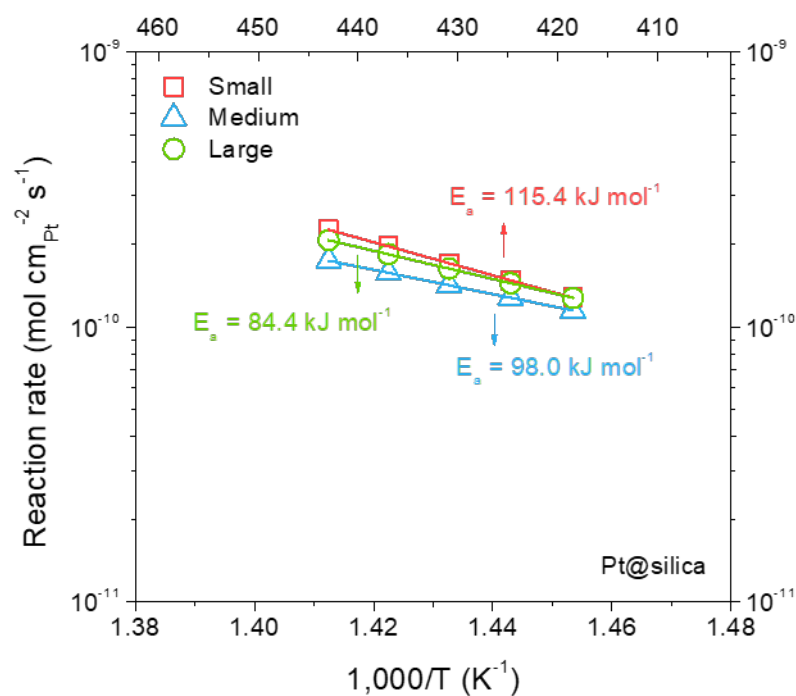

230

231 Arrhenius-type plots of CH<sub>4</sub> oxidation over silica-encapsulated Pt catalysts. Reaction rates are

232 normalized according to the exposed metallic surface area, as identified from CO chemisorption

233 analyses. The O<sub>2</sub>/CH<sub>4</sub> ratio of the input gas is 4.

234

235

236

237

238

239

240

241

242 **Fig. S17.**

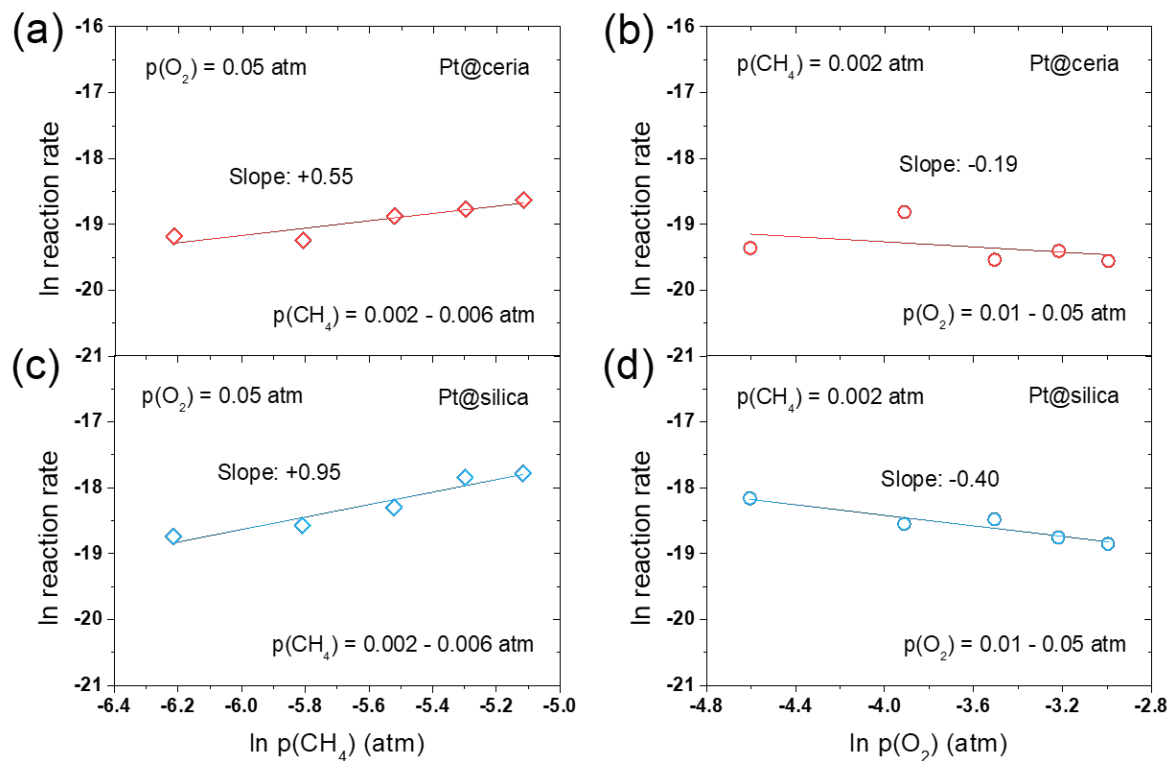

243  
 244 Reaction orders for (a, c) CH<sub>4</sub> and (b, d) O<sub>2</sub> of Pt-CeO<sub>2</sub> and Pt-silica catalysts; top, Pt@CeO<sub>2</sub>;  
 245 bottom; Pt@silica. Reaction orders of Pt@CeO<sub>2</sub> are less dependent on the partial pressure of both  
 246 CH<sub>4</sub> and O<sub>2</sub> compared to those of Pt@silica, implying the participation of Pt-CeO<sub>2</sub> interface sites  
 247 towards CH<sub>4</sub> oxidation.

255 **Fig. S18.**

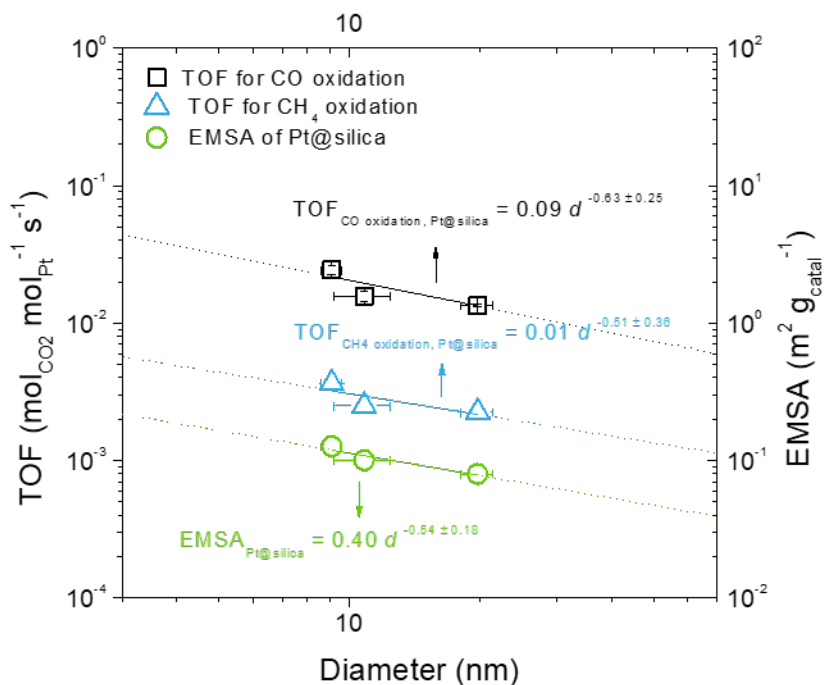

256

257 Turnover frequency (TOF) values of CO oxidation at 493 K (black empty squares) and of CH<sub>4</sub>

258 oxidation at 693 K (blue empty triangles) after catalyzation with silica-encapsulated Pt catalysts,

259 and variation in the exposed metallic surface area (EMSA) according to the Pt particle size of

260 Pt@silica (green empty circles). The O<sub>2</sub>/CH<sub>4</sub> and O<sub>2</sub>/CO ratios of the input gas are both 4. Error

261 bars indicate standard errors for particle sizes.

268 **Fig. S19.**

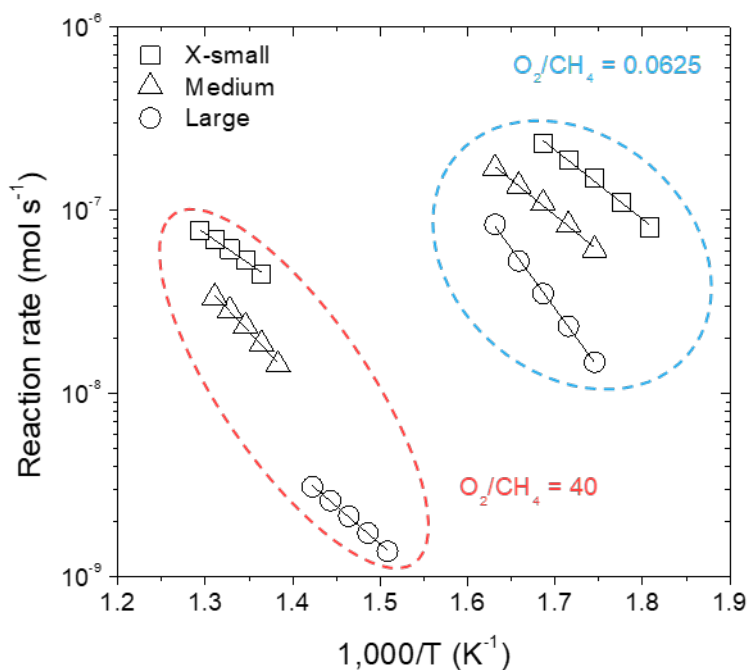

269

270 Arrhenius-type plots of CH<sub>4</sub> oxidation over Pt@CeO<sub>2</sub> catalysts. The results were categorized into

271 two groups, as indicated by the red circle (O<sub>2</sub>/CH<sub>4</sub> ratio = 40) and the blue circle (O<sub>2</sub>/CH<sub>4</sub> ratio =

272 0.0625). With a higher relative oxygen ratio, more oxygen covers the surface of the Pt, thereby

273 slowing down the overall CH<sub>4</sub> oxidation rate.

274

275

276

277

278

279

280

281 **Fig. S20.**

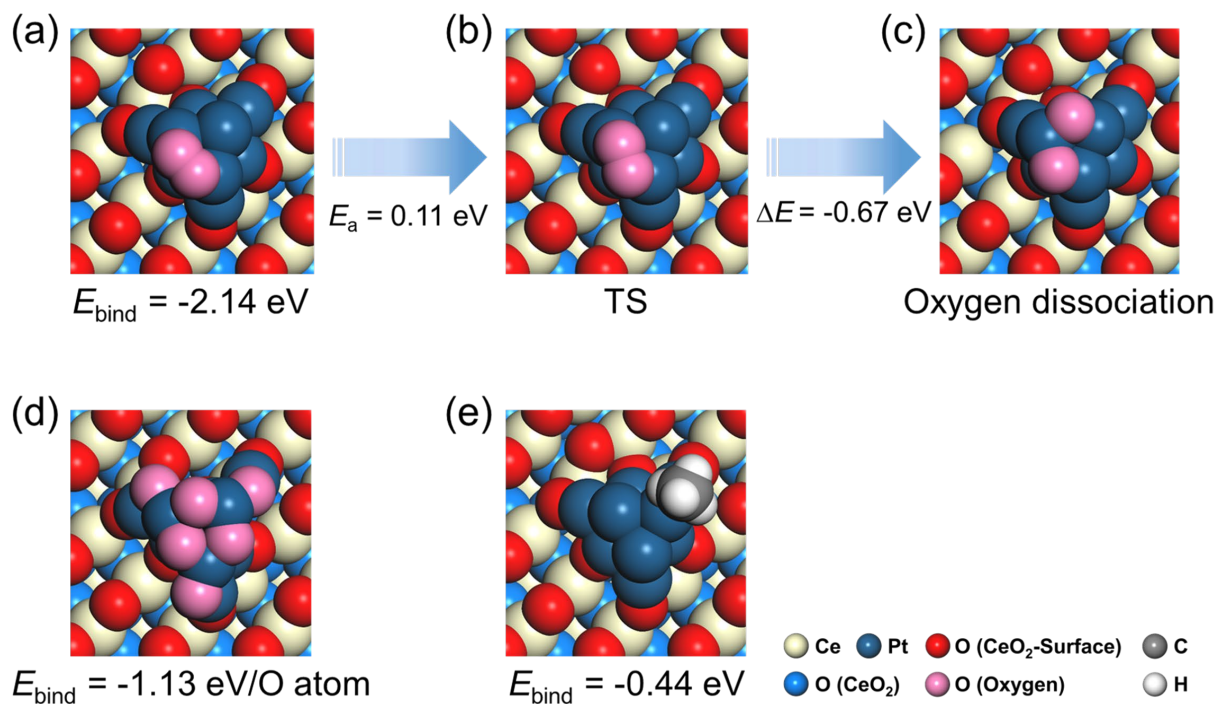

282

283 DFT-calculated interaction energy: (a-c) Energetics of O<sub>2</sub> binding and dissociation on a Pt<sub>9</sub>/CeO<sub>2</sub>

284 model catalyst, and (d) morphology of the oxygen-saturated Pt/CeO<sub>2</sub> model catalyst. Here,  $E_{\text{bind}}$

285 denotes the average binding energy of a single oxygen atom. (e) Binding energy and location of a

286 CH<sub>4</sub> molecule on a Pt/CeO<sub>2</sub> model catalyst.

295 Fig. S21.

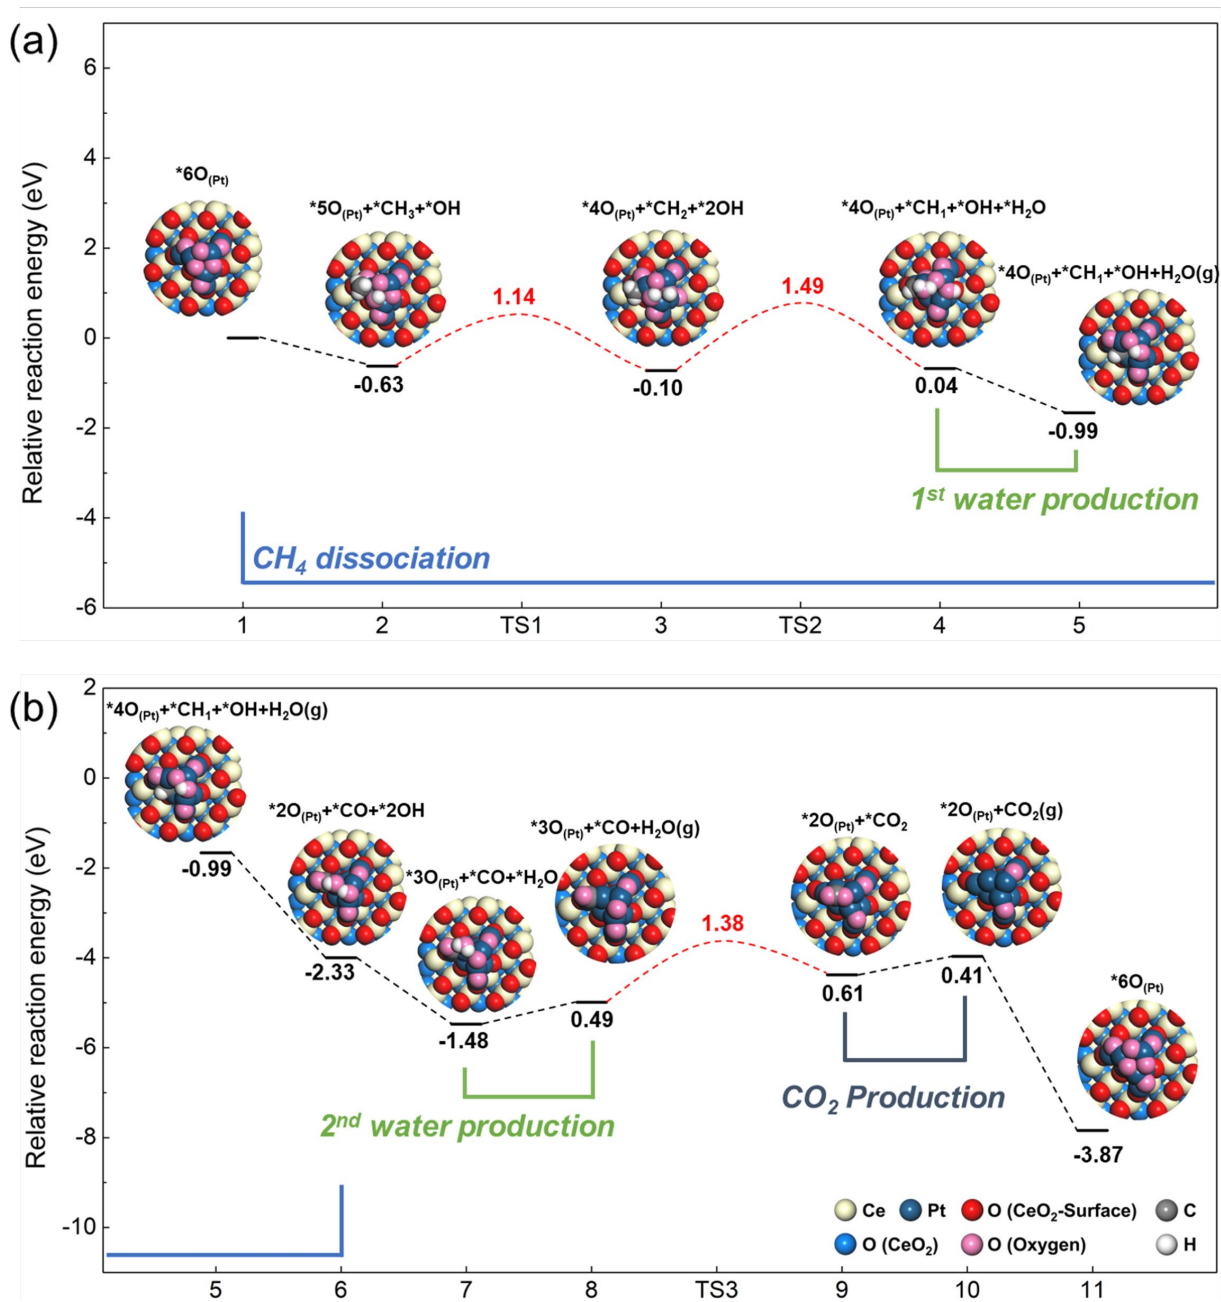

296

297 DFT-estimated complete CH<sub>4</sub> oxidation pathway by the 2PB of Pt/CeO<sub>2</sub>: (a) energetics of CH<sub>4</sub>

298 binding, CH<sub>4</sub> dissociation, and the first water production; (b) energetics of the second water and

299 CO<sub>2</sub> productions

300



301 **Fig. S22.**

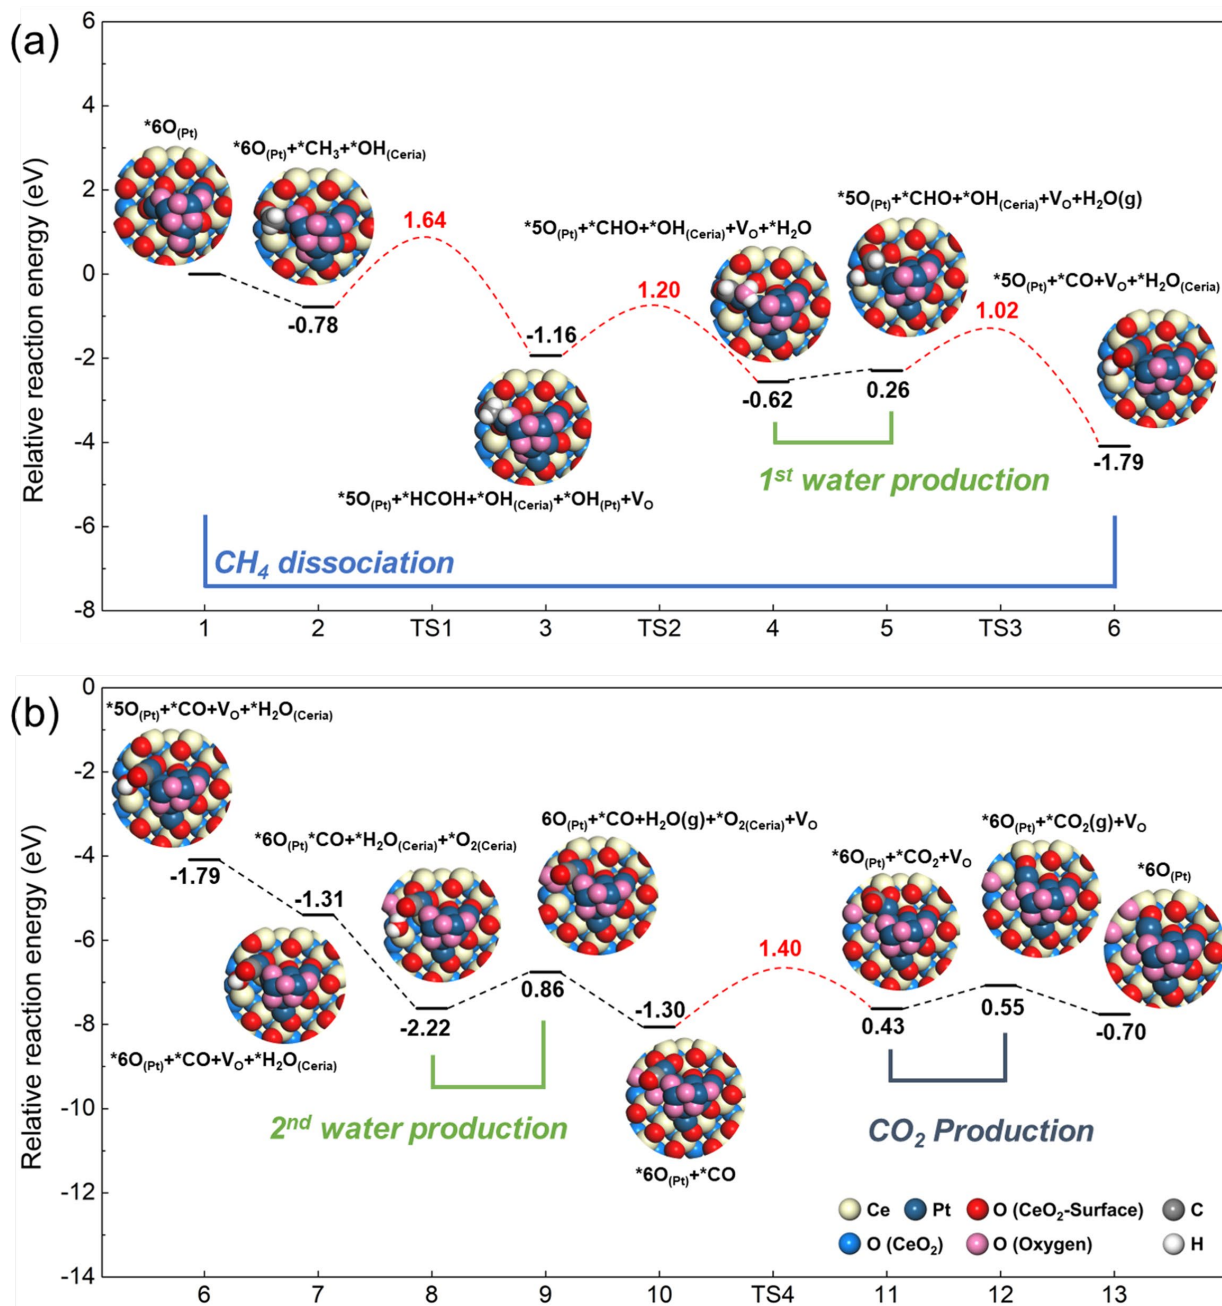

302

303 DFT-estimated complete CH<sub>4</sub> oxidation pathway by the 3PB of Pt/CeO<sub>2</sub>: (a) energetics of CH<sub>4</sub>

304 binding, CH<sub>4</sub> dissociation, and the first water production; (b) energetics of the second water and

305 CO<sub>2</sub> productions

306

307 **Fig. S23.**

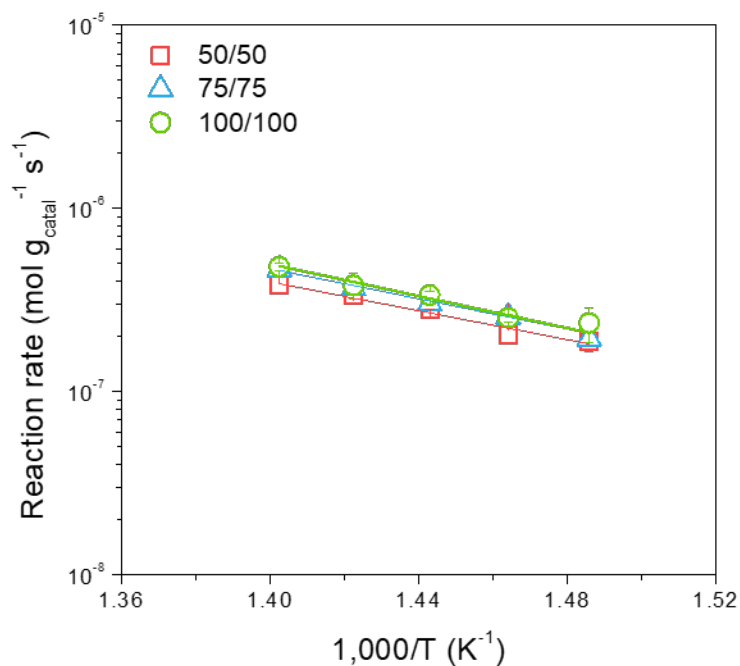

308

309 CH<sub>4</sub> oxidation rates of Pt-x-small@CeO<sub>2</sub> catalysts measured when changing the total flow rate at

310 a constant space velocity (60,000 mL g<sub>catal</sub><sup>-1</sup> h<sup>-1</sup>). The conversion rate remains steady, indicating

311 that neither the mass nor the heat transfer affect the rate of the chemical process. Here, the 50/50

312 notation refers to the reaction conditions using a 50 mg catalyst and a flow rate of 50 mL min<sup>-1</sup>.

313 Likewise, the 75/75 and 100/100 notations represent the reaction conditions using, respectively,

314 75 mg and 100 mg of the catalyst and corresponding flow rates of 75 mL min<sup>-1</sup> and 100 mL min<sup>-1</sup>.

315 <sup>1</sup>. The O<sub>2</sub>/CH<sub>4</sub> ratio of the input gas is 4. Error bars indicate standard errors for reaction rates.

316

317

318

319

320 Fig. S24.

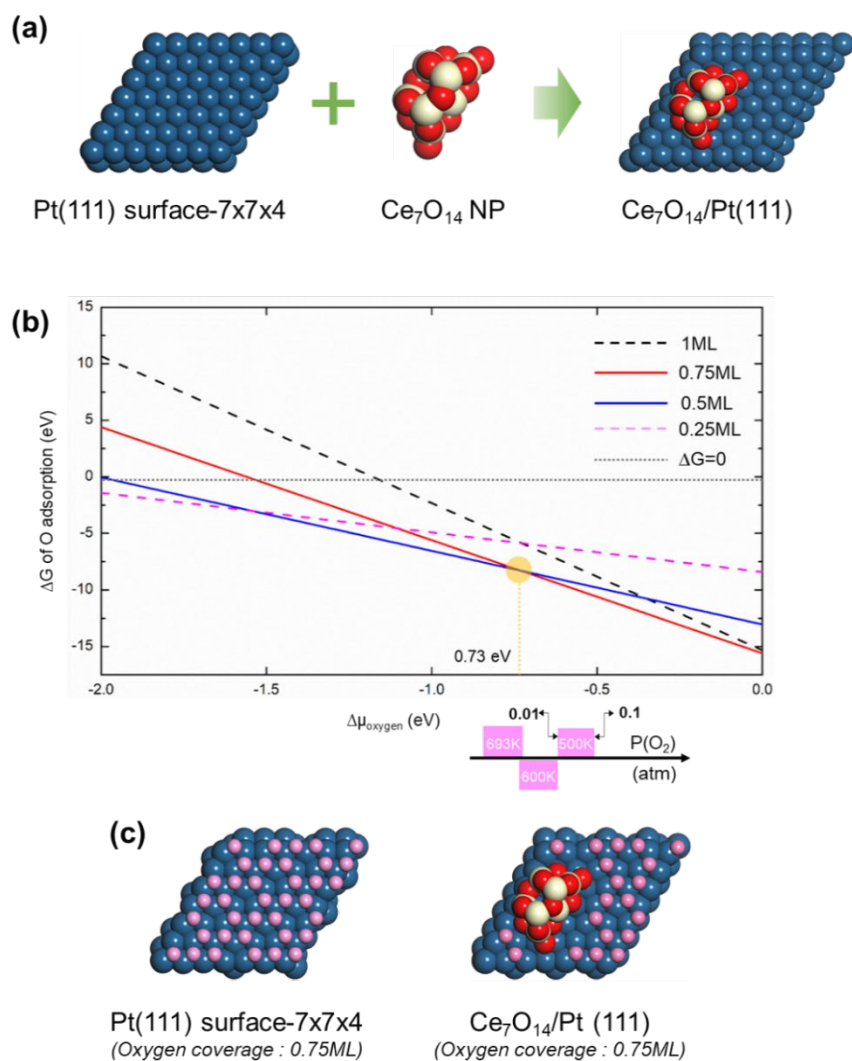

321 Construction of the inverse  $\text{Ce}_7\text{O}_{14}/\text{Pt}(111)$  model used for  $\text{CH}_4$  oxidation: (a) Optimized structure  
 322 models of  $\text{Pt}(111)$ ,  $\text{Ce}_7\text{O}_{14}$ , and  $\text{Ce}_7\text{O}_{14}/\text{Pt}(111)$ . (b)  $\Delta G$  of oxygen adsorption on  $\text{Pt}(111)$  presented  
 323 as a function of the  $\Delta\mu$  of oxygen. Individual lines represent  $\text{Pt}(111)$  covered with the denoted  
 324 oxygen surface coverage. Details of the  $\Delta G$  calculation as a function of the  $\Delta\mu$  of oxygen can be  
 325 found in the literature<sup>1</sup>. The yellow vertical line represents the cross point between 0.5ML and  
 326 0.75ML. The colored boxes below indicate the range of the oxygen partial pressure (0.01 atm ~  
 327 0.1 atm) at the given temperatures. (c) Optimized  $\text{Pt}(111)$  and  $\text{Ce}_7\text{O}_{14}/\text{Pt}(111)$  with 0.75 ML of  
 328 oxygen coverage on Pt.

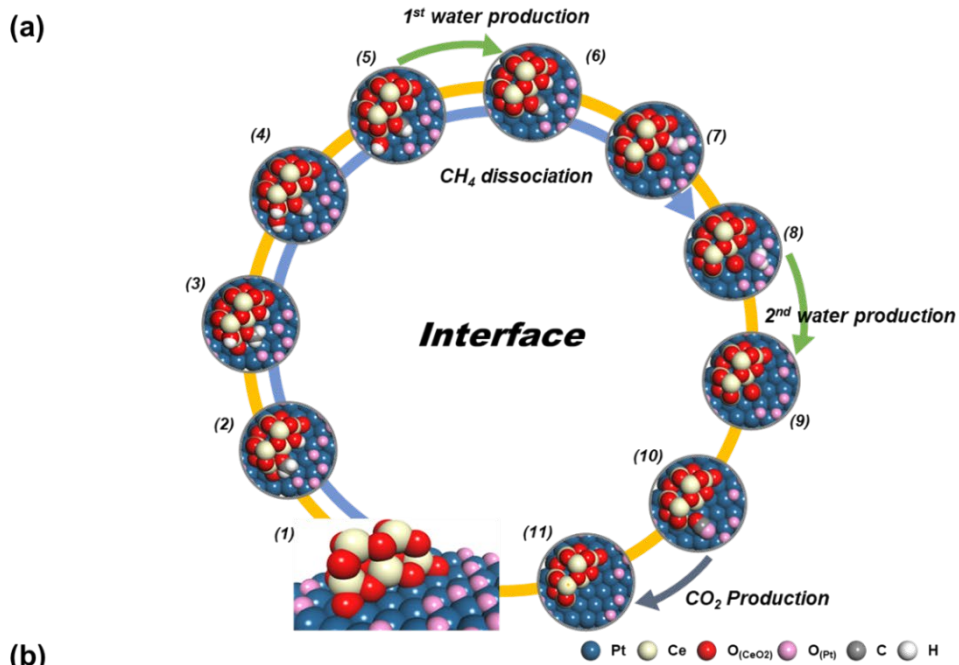

|      | Reaction step & Species                                                                                                      | Reaction energy(eV)     | Activation energy barrier(eV) |
|------|------------------------------------------------------------------------------------------------------------------------------|-------------------------|-------------------------------|
| (1)  | $^*\text{O}_{(\text{Pt})}$                                                                                                   |                         |                               |
| (2)  | $^*\text{O}_{(\text{Pt})} + ^*\text{CH}_3 + ^*\text{OH}_{(\text{Ceria})}$                                                    | $\Delta E_2 = -1.97$    |                               |
| (3)  | $^*\text{O}_{(\text{Pt})} + ^*\text{CH}_2 + 2^*\text{OH}_{(\text{Ceria})}$                                                   | $\Delta E_3 = -1.24$    | 1.23                          |
| (4)  | $^*\text{O}_{(\text{Pt})} + ^*\text{CH}_1 + 3^*\text{OH}_{(\text{Ceria})}$                                                   | $\Delta E_4 = -1.18$    | 0.68                          |
| (5)  | $^*\text{O}_{(\text{Pt})} + ^*\text{CH}_1 + ^*\text{OH}_{(\text{Ceria})} + \text{V}_\text{O} + ^*\text{H}_2\text{O}$         | $\Delta E_5 = 0.13$     | 0.93                          |
| (6)  | $^*\text{O}_{(\text{Pt})} + ^*\text{CH}_1 + ^*\text{OH}_{(\text{Ceria})} + \text{V}_\text{O} + \text{H}_2\text{O}(\text{g})$ | $\Delta E_6 = 0.88$     |                               |
| (7)  | $^*\text{O}_{(\text{Pt})} + ^*\text{CO} + ^*\text{OH}_{(\text{Ceria})} + ^*\text{OH}_{(\text{Pt})} + \text{V}_\text{O}$      | $\Delta E_7 = -0.32$    |                               |
| (8)  | $^*\text{O}_{(\text{Pt})} + ^*\text{CO} + 2\text{V}_\text{O} + \text{H}_2\text{O}$                                           | $\Delta E_8 = -0.29$    |                               |
| (9)  | $^*\text{O}_{(\text{Pt})} + ^*\text{CO} + 2\text{V}_\text{O} + \text{H}_2\text{O}(\text{g})$                                 | $\Delta E_9 = 0.18$     |                               |
| (10) | $^*\text{O}_{(\text{Pt})} + ^*\text{CO}_2 + 2\text{V}_\text{O}$                                                              | $\Delta E_{10} = -1.96$ | 0.52                          |
| (11) | $^*\text{O}_{(\text{Pt})} + \text{CO}_2(\text{g}) + 2\text{V}_\text{O}$                                                      | $\Delta E_{11} = 0.59$  |                               |

330 DFT-estimated  $\text{CH}_4$  oxidation pathway at the 3PB of  $\text{Ce}_7\text{O}_{14}/\text{Pt}(111)$ : (a) Sequential process of  
 331  $\text{CH}_4$  oxidation. (b) Corresponding reaction energy and activation energy barrier of  $\text{CH}_4$  oxidation.  
 332 Here,  $\Delta E_n$  denotes the reaction energy associated with the reaction from the  $(n-1)^{\text{th}}$  state to the  $(n)^{\text{th}}$   
 333 state. The activation energy barrier of the  $n^{\text{th}}$  state is required to activate the reaction from the  $(n-1)^{\text{th}}$   
 334 state to the  $(n)^{\text{th}}$  state.

335 Fig. S26.

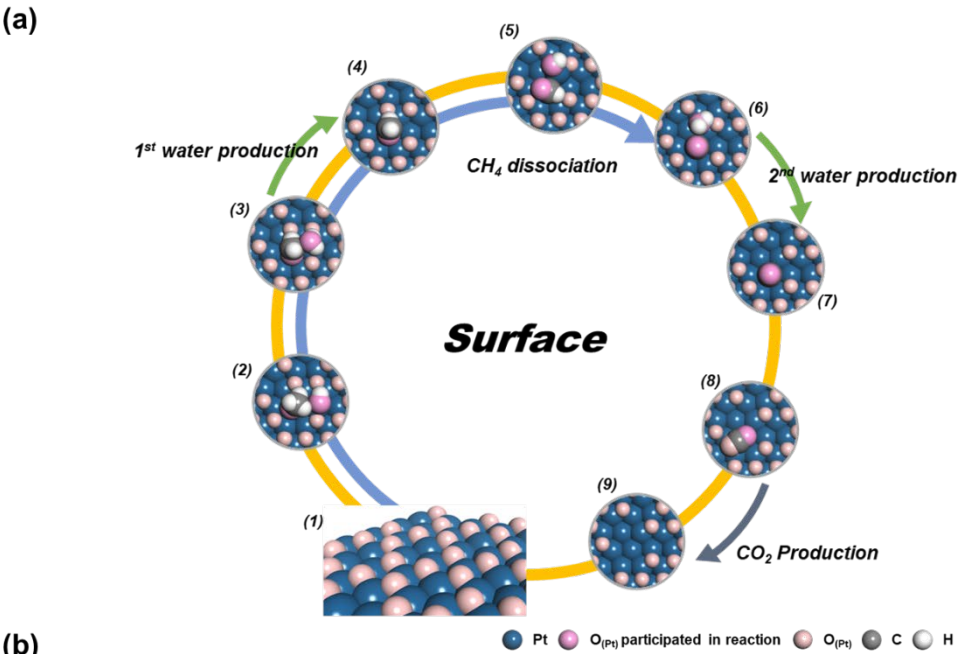

(b)

|     | Reaction step & Species          | Reaction energy(eV)  | Activation energy barrier(eV) |
|-----|----------------------------------|----------------------|-------------------------------|
| (1) | $*O_{(Pt)}$                      |                      |                               |
| (2) | $*O_{(Pt)} + *CH_3 + *OH$        | $\Delta E_2 = -1.27$ |                               |
| (3) | $*O_{(Pt)} + *CH_2 + *H_2O$      | $\Delta E_3 = -1.97$ | 0.22                          |
| (4) | $*O_{(Pt)} + *CH_2 + H_2O_{(g)}$ | $\Delta E_4 = 0.30$  |                               |
| (5) | $*O_{(Pt)} + *CH_1 + *OH$        | $\Delta E_5 = -1.38$ | 0.18                          |
| (6) | $*O_{(Pt)} + *CO + *H_2O$        | $\Delta E_6 = -1.53$ |                               |
| (7) | $*O_{(Pt)} + *CO + H_2O_{(g)}$   | $\Delta E_7 = 0.10$  |                               |
| (8) | $*O_{(Pt)} + *CO_2$              | $\Delta E_8 = -2.06$ | 0.48                          |
| (9) | $*O_{(Pt)} + CO_{2(g)}$          | $\Delta E_9 = 0.0$   |                               |

336 DFT-estimated CH<sub>4</sub> oxidation pathway on the 2PB of Ce<sub>7</sub>O<sub>14</sub>/Pt(111): (a) Sequential process of  
337 CH<sub>4</sub> oxidation. (b) Corresponding reaction energy and activation energy barrier of CH<sub>4</sub> oxidation.  
338 Here,  $\Delta E_n$  denotes the reaction energy associated with the reaction from the  $(n-1)^{th}$  state to the  $(n)^{th}$   
339 state. The activation energy barrier of the  $n^{th}$  state is required to activate the reaction from the  $(n-$   
340  $1)^{th}$  state to the  $(n)^{th}$  state.

**Table S1.** The tomography resolution values of the sample used in this study. The resolution was estimated using Fourier shell correlation (FSC) at the criterion of 0.143.

| Condition                      | Pt diameter<br>(nm) | Resolution (nm)<br><criterion: 0.143> |
|--------------------------------|---------------------|---------------------------------------|
| Before<br>thermal<br>treatment | 11.4                | 1.58                                  |
|                                | 12.4                | 1.41                                  |
|                                | 14.4                | 1.40                                  |
|                                | 23.0                | 1.49                                  |
| After<br>thermal<br>treatment  | 7.9                 | 1.19                                  |
|                                | 10.0                | 1.19                                  |
|                                | 18.3                | 1.17                                  |
|                                | 21.3                | 1.13                                  |
|                                | 21.8                | 0.96                                  |

**Table S2.** Pt particle size, 2PB area density, and 3PB length density quantified on the basis of the segmentation process. Error bars indicate standard errors for estimated particle size, 2PB area density, and 3PB length density.

| Condition                | Pt size (nm) | 2PB area density (nm <sup>2</sup> /g <sub>Pt</sub> ) | 3PB length density (nm/g <sub>Pt</sub> )        |
|--------------------------|--------------|------------------------------------------------------|-------------------------------------------------|
| Before thermal treatment | 23.2 ± 0.9   | 5.0 × 10 <sup>18</sup> ± 2.1 × 10 <sup>17</sup>      | 2.1 × 10 <sup>18</sup> ± 8.5 × 10 <sup>16</sup> |
|                          | 14.4 ± 0.3   | 1.0 × 10 <sup>19</sup> ± 2.4 × 10 <sup>17</sup>      | 9.5 × 10 <sup>18</sup> ± 5.4 × 10 <sup>17</sup> |
|                          | 12.4 ± 0.5   | 1.1 × 10 <sup>19</sup> ± 4.2 × 10 <sup>17</sup>      | 1.3 × 10 <sup>19</sup> ± 7.8 × 10 <sup>17</sup> |
|                          | 11.4 ± 0.4   | 1.3 × 10 <sup>19</sup> ± 3.6 × 10 <sup>17</sup>      | 1.2 × 10 <sup>19</sup> ± 7.6 × 10 <sup>17</sup> |
| After thermal treatment  | 21.8 ± 0.3   | 5.1 × 10 <sup>18</sup> ± 1.8 × 10 <sup>17</sup>      | 4.5 × 10 <sup>18</sup> ± 2.5 × 10 <sup>17</sup> |
|                          | 21.3 ± 0.4   | 5.7 × 10 <sup>18</sup> ± 1.4 × 10 <sup>17</sup>      | 4.7 × 10 <sup>18</sup> ± 2.8 × 10 <sup>17</sup> |
|                          | 18.3 ± 0.4   | 6.7 × 10 <sup>18</sup> ± 2.2 × 10 <sup>17</sup>      | 6.1 × 10 <sup>18</sup> ± 3.5 × 10 <sup>17</sup> |
|                          | 9.9 ± 0.2    | 9.0 × 10 <sup>18</sup> ± 5.5 × 10 <sup>17</sup>      | 1.2 × 10 <sup>19</sup> ± 6.9 × 10 <sup>17</sup> |
|                          | 7.9 ± 0.1    | 1.4 × 10 <sup>19</sup> ± 9.2 × 10 <sup>17</sup>      | 2.0 × 10 <sup>19</sup> ± 1.1 × 10 <sup>18</sup> |



**Table S3.** Average size of Pt NPs, concentration of Pt NPs dispersed in 5 mL of deionized water, and exposed metallic surface area (EMSA) of Pt@CeO<sub>2</sub> and Pt@silica catalysts as measured by CO chemisorption. Error bars indicate standard errors for particle sizes

| Sample    | d (nm)     | Concentration (ppm) | EMSA (m <sup>2</sup> g <sup>-1</sup> ) |                     |
|-----------|------------|---------------------|----------------------------------------|---------------------|
|           |            |                     | CeO <sub>2</sub> -encapsulated         | Silica-encapsulated |
| Pt-xsmall | 7.8 ± 0.8  | 561.8               | 0.34                                   | -                   |
| Pt-small  | 9.1 ± 0.5  | 364.5               | -                                      | 0.13                |
| Pt-medium | 10.8 ± 1.6 | 707.7               | 0.26                                   | 0.10                |
| Pt-large  | 19.7 ± 1.7 | 556.5               | 0.14                                   | 0.08                |

**Table S4.** Estimated contribution ratios of the 2PB and 3PB according to the Pt diameter. The reaction temperature is 823 K. The O<sub>2</sub>/CH<sub>4</sub> ratio of the input gas is 4.

| Pt NP size (nm) | 2PB contribution ratio | 3PB contribution ratio |
|-----------------|------------------------|------------------------|
| 1               | 0.10                   | 0.90                   |
| 5               | 0.31                   | 0.69                   |
| 10              | 0.45                   | 0.55                   |
| 20              | 0.59                   | 0.41                   |
| 40              | 0.73                   | 0.27                   |
| 60              | 0.79                   | 0.21                   |
| 80              | 0.83                   | 0.17                   |
| 100             | 0.85                   | 0.15                   |

**Table S5.** Estimated contribution ratios of 2PB and 3PB according to the Pt diameter. The reaction temperature is 723 K. The O<sub>2</sub>/CH<sub>4</sub> ratio of the input gas is 4.

| Pt NP size (nm) | 2PB contribution ratio | 3PB contribution ratio |
|-----------------|------------------------|------------------------|
| 1               | 0.02                   | 0.98                   |
| 5               | 0.09                   | 0.91                   |
| 10              | 0.15                   | 0.85                   |
| 20              | 0.25                   | 0.75                   |
| 40              | 0.37                   | 0.63                   |
| 60              | 0.46                   | 0.54                   |
| 80              | 0.52                   | 0.48                   |
| 100             | 0.57                   | 0.43                   |

**Table S6.** Surface potential of pristine CeO<sub>2</sub> and Pt-medium@CeO<sub>2</sub> in the presence/absence of 10 mM of the tetradecyltrimethylammonium bromide (TTAB) surfactant. The potential of deionized water including only TTAB was examined to determine the effect of the TTAB itself on the measured potential. All samples are dispersed in water with a pH value of approximately 10.

| Sample                                  | Zeta potential (mV) |                     |
|-----------------------------------------|---------------------|---------------------|
|                                         | 1 <sup>st</sup> run | 2 <sup>nd</sup> run |
| Pristine CeO <sub>2</sub> <sup>a</sup>  | +43.12              | +43.14              |
| Pristine CeO <sub>2</sub>               | -43.36              | -45.44              |
| Pt-medium@CeO <sub>2</sub> <sup>a</sup> | +41.66              | +40.00              |
| Pt-medium@CeO <sub>2</sub>              | -49.72              | -50.90              |
| Deionized water <sup>a</sup>            | -0.40               | N/A                 |
| Deionized water                         | -1.56               | -1.24               |

<sup>a</sup> 10 mM of tetradecyltrimethylammonium bromide was added.

**Table S7.** Representative mass ratios of Pt-medium@CeO<sub>2</sub> and Pt-medium/CeO<sub>2</sub> catalysts as measured by an X-ray fluorescence (XRF) analysis

| Sample                                       | Average (mass %) |                  | Standard deviation (mass %) |                  |
|----------------------------------------------|------------------|------------------|-----------------------------|------------------|
|                                              | Pt               | CeO <sub>2</sub> | Pt                          | CeO <sub>2</sub> |
| Pt-medium@CeO <sub>2</sub> /CeO <sub>2</sub> | 0.91             | 99.09            | 0.09                        | 0.09             |
| Pt-medium/CeO <sub>2</sub>                   | 1.04             | 98.96            | 0.16                        | 0.16             |

438 **List of Supplementary Video**

439 **Video S1.** The morphological and mechanical motions of the 3D-reconstructed Pt@CeO<sub>2</sub> core-  
440 shell catalysts

441

442 **Reference**

- 443 1. Lee J-H, Yoo M, Kang D, Lee H-M, Choi W-h, Park JW, *et al.* Selective SnO<sub>x</sub> Atomic  
444 Layer Deposition Driven by Oxygen Reactants. *ACS Applied Materials & Interfaces*  
445 2018, **10**(39): 33335-33342.

446
